# Supplementary material for: Lithium ion transport in solid polymer electrolyte filled with alumina nanoparticles
Source: Royal Society of Chemistry journal article supplement (doi:10.1039/d2ya00025c), 2022-01-01
Supplement: d2ya00025c1.pdf [file d2ya00025c1.pdf]

## **Supplementary Material**

# **Lithium Ion Transport in Solid Polymer Electrolyte Filled with Alumina Nanoparticles**

Jiaqi Wang, Linhao Fan, Qing Du\*, Kui Jiao\*

State Key Laboratory of Engines, Tianjin University, 135 Yaguan Road, Tianjin 300350, China

\*Corresponding Authors: [duqing@tju.edu.cn](mailto:duqing@tju.edu.cn); [kjiao@tju.edu.cn](mailto:kjiao@tju.edu.cn)

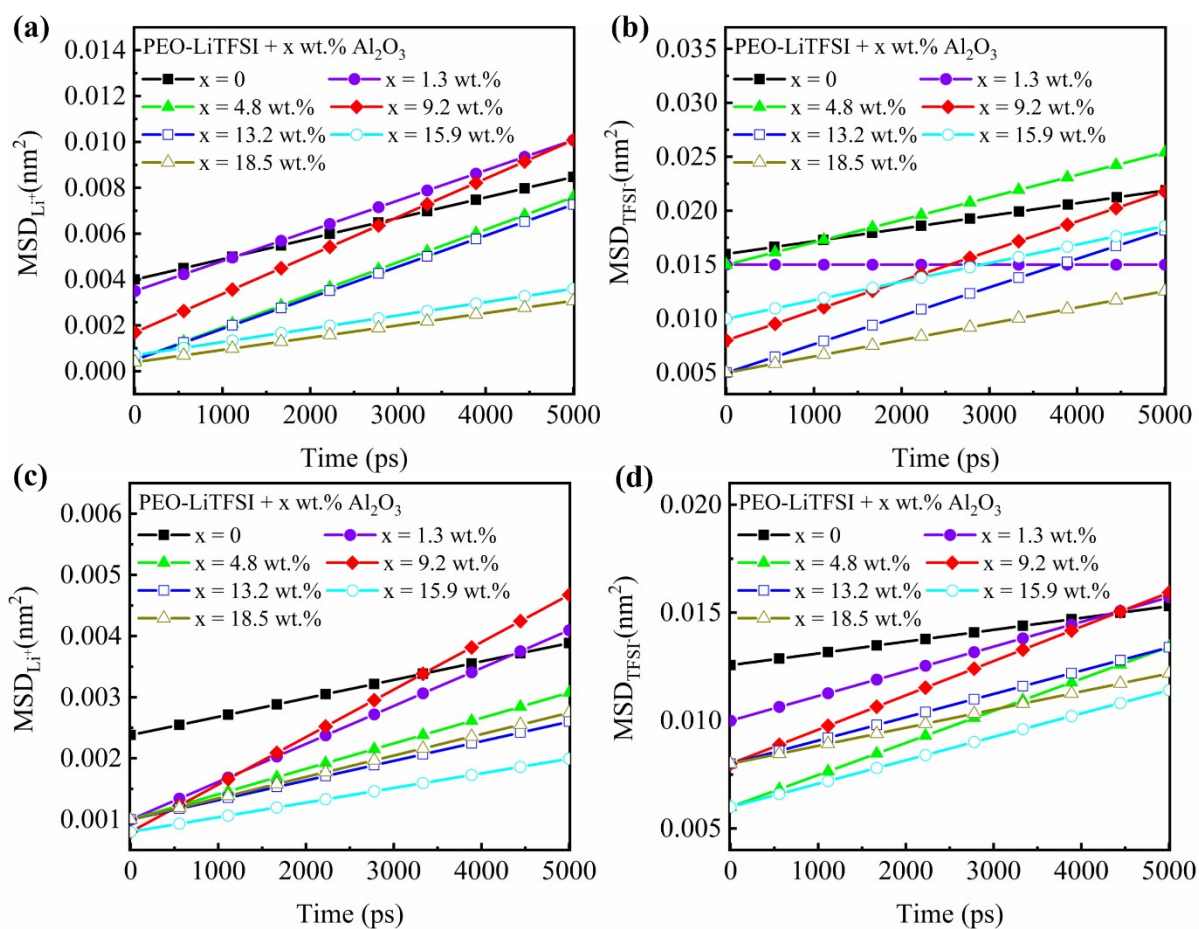

Figure S1. Mean square displacement (MSD) functions of (a)  $\text{Li}^+$  at 333 K, (b)  $\text{TFSI}^-$  at 333 K, (c)  $\text{Li}^+$  cations at 300 K, and (d)  $\text{TFSI}^-$  at 300 K in the SC system. PEO-LiTFSI + x wt.%  $\text{Al}_2\text{O}_3$  represents PEO-LiTFSI with x wt.%  $\text{Al}_2\text{O}_3$ . x is the mass fraction of  $\text{Al}_2\text{O}_3$ .

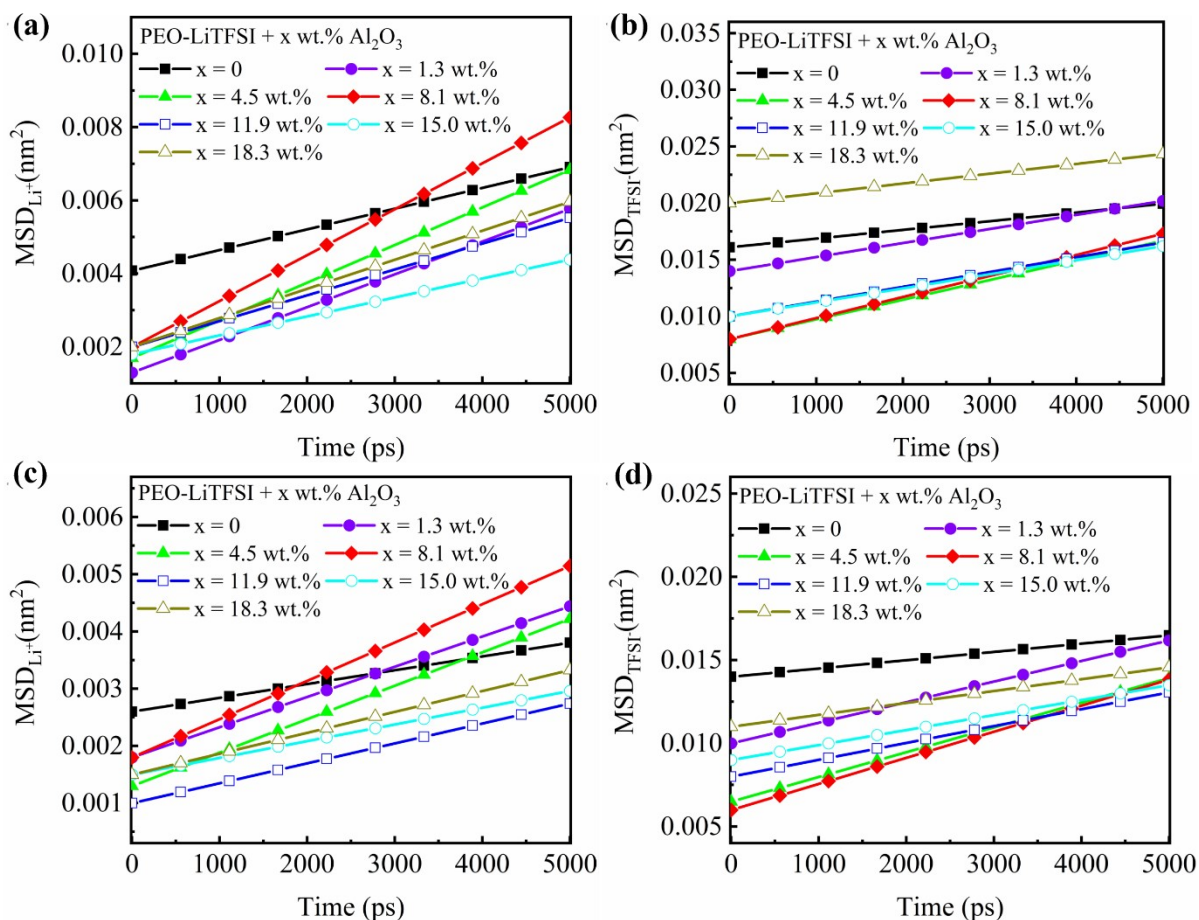

Figure S2. Mean square displacement (MSD) functions of (a)  $\text{Li}^+$  at 333 K, (b)  $\text{TFSI}^-$  at 333 K, (c)  $\text{Li}^+$  cations at 300 K, and (d)  $\text{TFSI}^-$  at 300 K in the LC system.

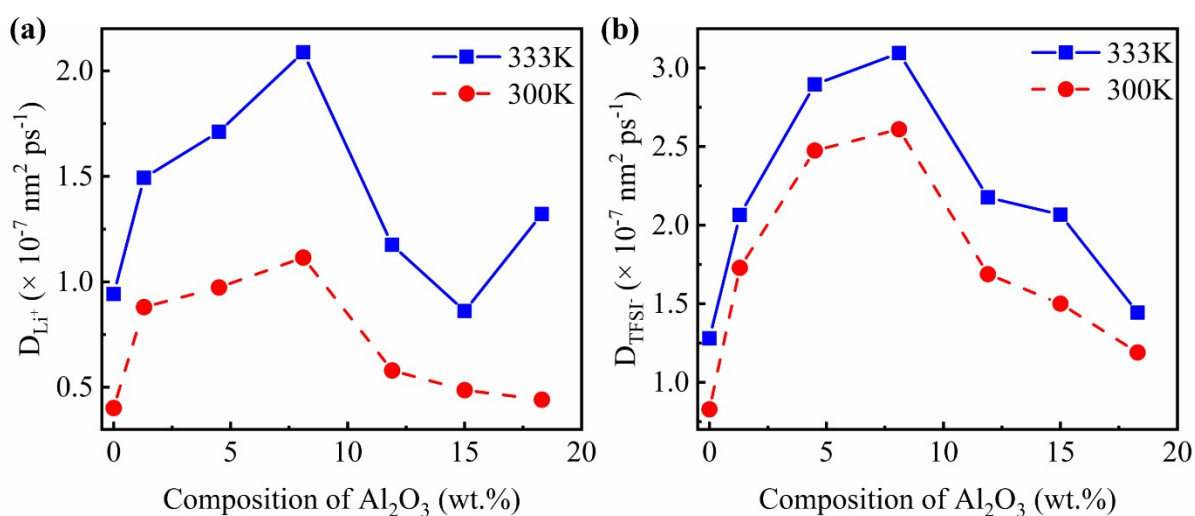

Figure S3. Diffusivities of (a)  $\text{Li}^+$  and (b)  $\text{TFSI}^-$  at different temperatures in the LC system.

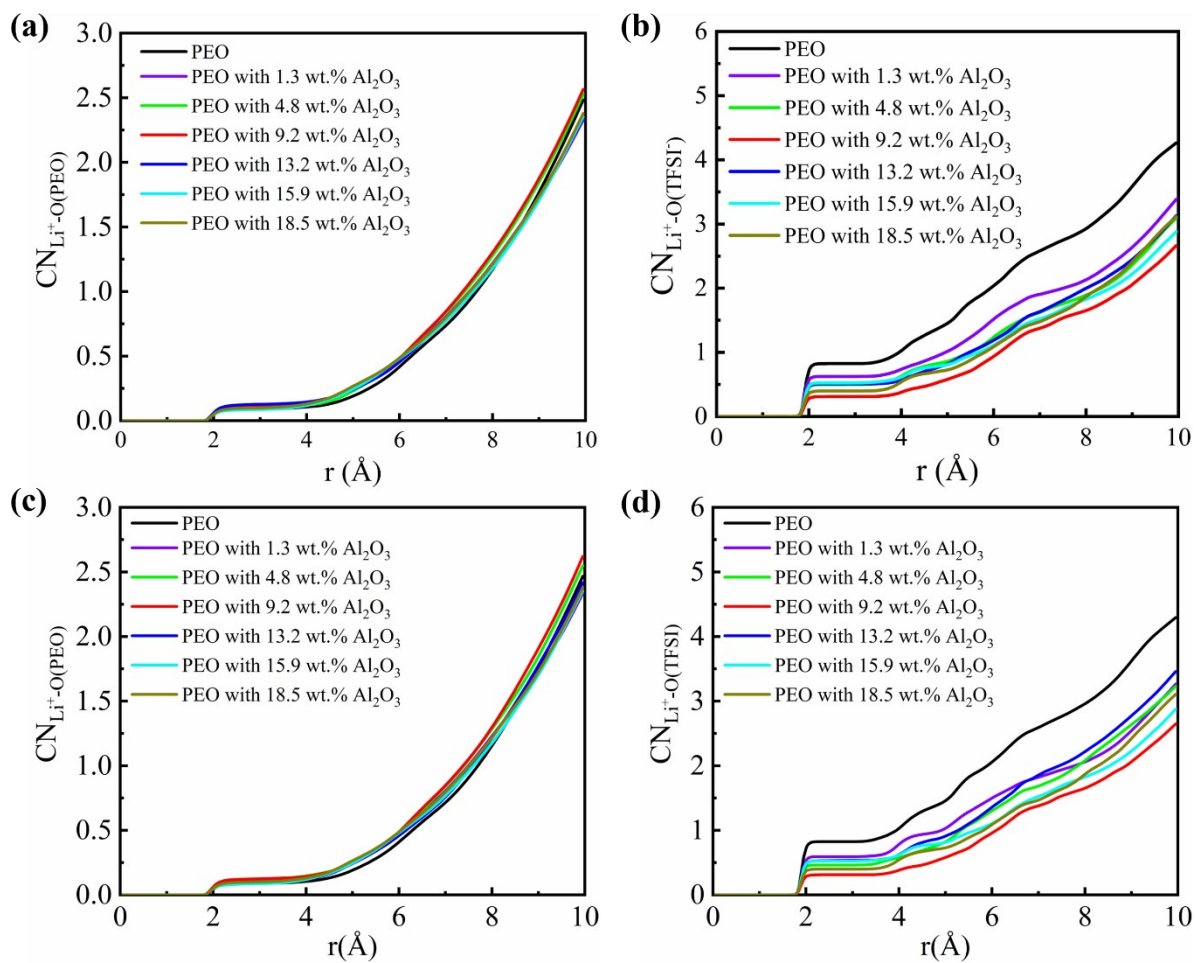

Figure S4. Coordination number (CN) for (a)  $\text{Li}^+\text{-O(PEO)}$  at 333 K, (b)  $\text{Li}^+\text{-O(TFSI)}$  at 333 K, (c)  $\text{Li}^+\text{-O(PEO)}$  at 300 K, and (d)  $\text{Li}^+\text{-O(TFSI)}$  at 300 K in the SC systems.

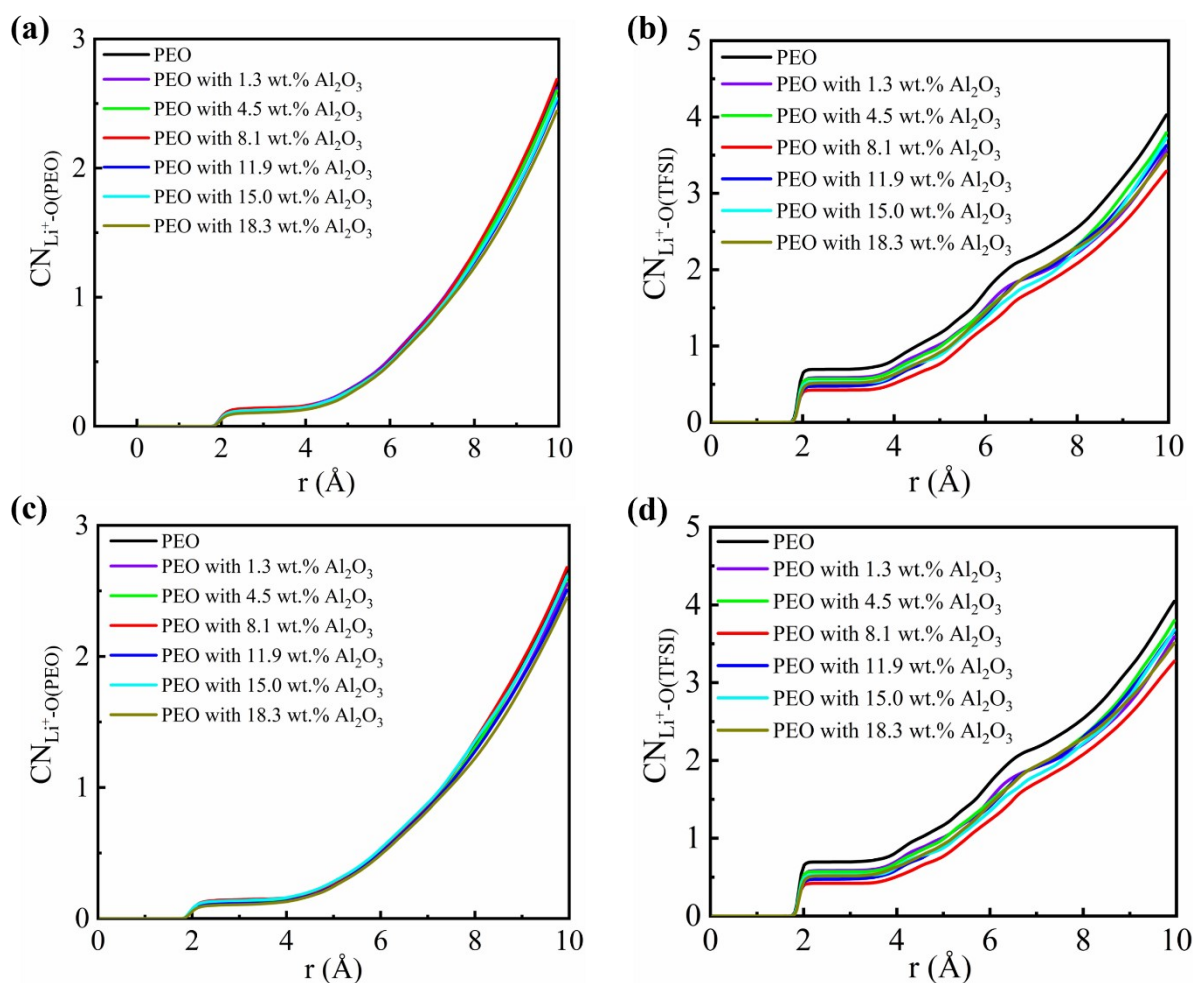

Figure S5. Coordination number (CN) for (a) Li<sup>+</sup>-O(PEO) at 333 K, (b) Li<sup>+</sup>-O(TFSI) at 333 K, (c) Li<sup>+</sup>-O(PEO) at 300 K, and (d) Li<sup>+</sup>-O(TFSI) at 300 K in the LC systems.

The CN of Li<sup>+</sup>-O (PEO) increases from 2.48 to 2.57 at 333 K and increases from 2.46 to 2.62 at 300 K in the SC system, which can explain the larger increase in the conductivity of SPE at 300 K than that at 333 K. The CN of Li<sup>+</sup>-O (PEO) increases from 2.61 to 2.67 at 333 K and increases from 2.60 to 2.72 at 300 K in the LC system.
